# Supplementary material for: Chemically exfoliated boron nanosheets for efficient oxidative dehydrogenation of propane
Source: Royal Society of Chemistry journal article supplement (doi:10.1039/d3nr05212e), 2023-12-06
Supplement: d3nr05212e1.pdf [file d3nr05212e1.pdf]

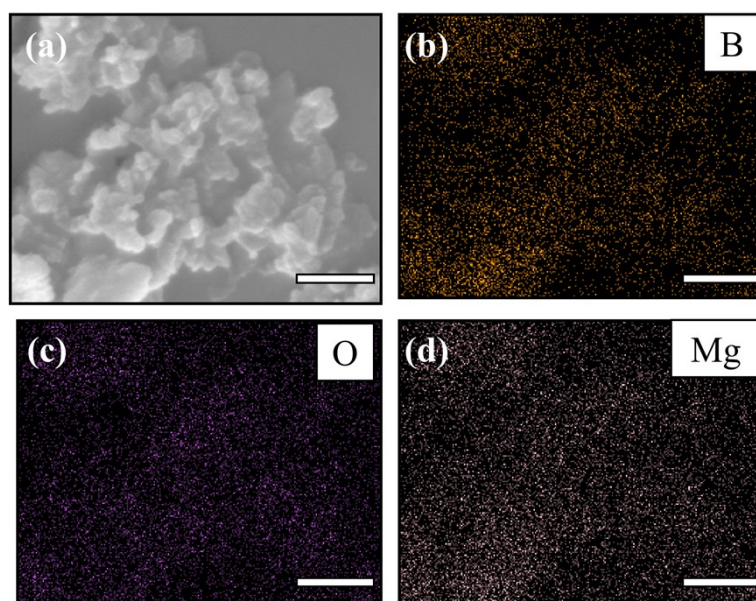

**Figure S1.** (a) SEM image of Mg-BNSs. (b-d) EDX mapping of Mg-BNSs.

Scale bars, 200 nm.

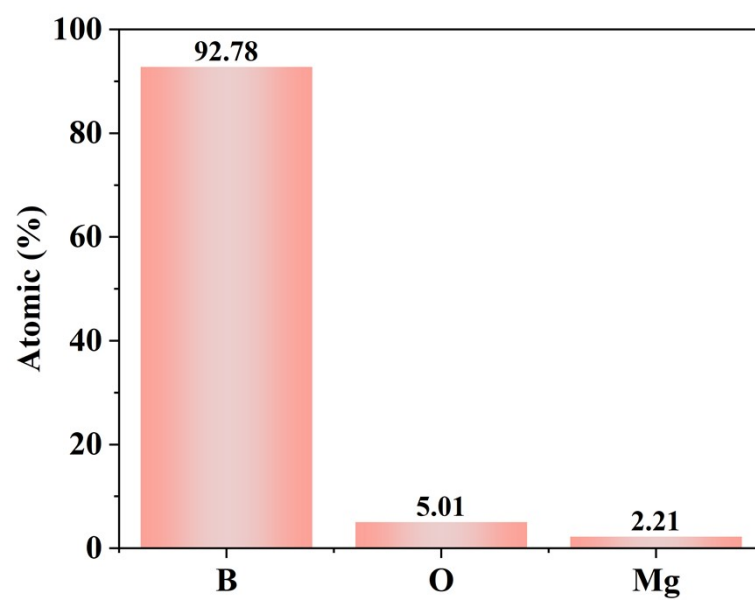

**Figure S2.** EDX analysis results of Mg-BNSs.

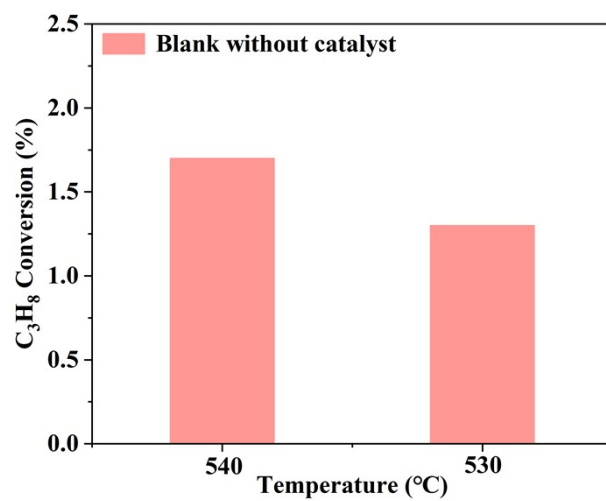

**Figure S3.** The blank without catalyst test for ODHP. Reaction conditions: atmospheric pressure,  $C_3H_8/O_2/N_2$  ratio = 1 : 1 : 3, WHSV = 24000 ml/g/h.

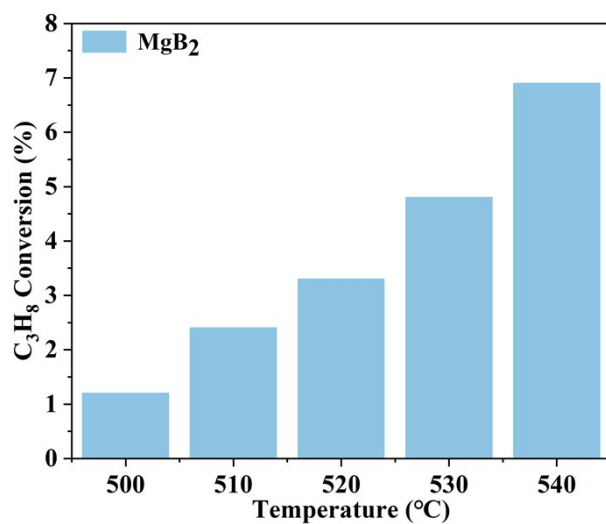

**Figure S4.** Catalytic performance of  $\text{MgB}_2$  at different temperatures. Reaction conditions: atmospheric pressure,  $\text{C}_3\text{H}_8/\text{O}_2/\text{N}_2$  ratio = 1 : 1 : 3, WHSV = 24000 ml/g/h.

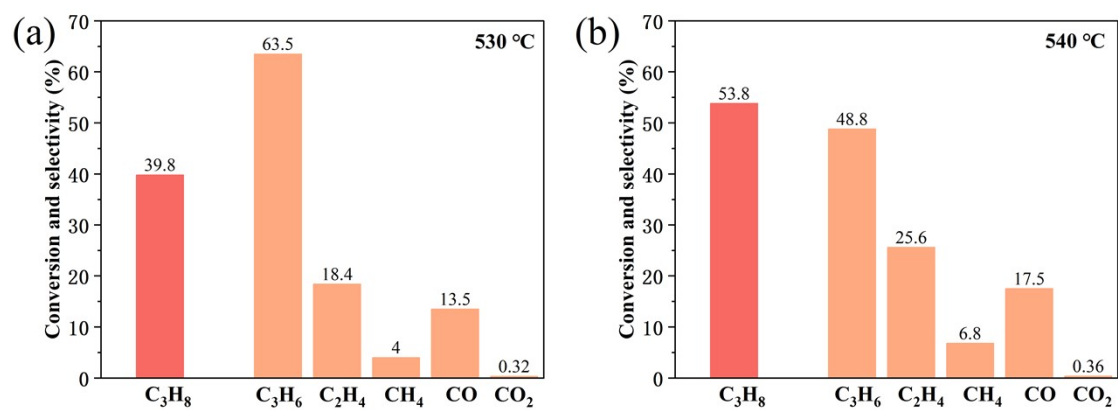

**Figure S5.** Propane conversions and product selectivities of Mg-BNSs at 530 °C and 540 °C. Reaction conditions: atmospheric pressure, C<sub>3</sub>H<sub>8</sub>/O<sub>2</sub>/N<sub>2</sub> ratio = 1 : 1 : 3, WHSV = 24000 ml/g/h.

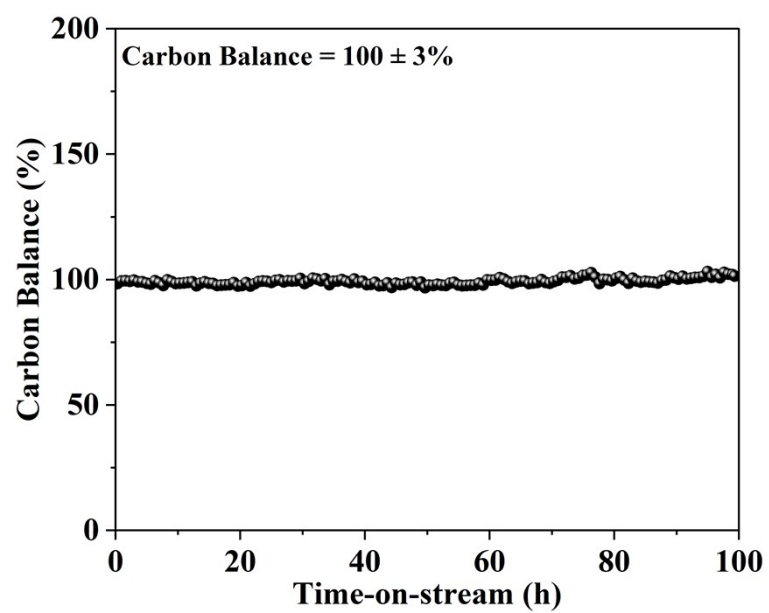

**Figure S6.** Carbon balance of Mg-BNSs during the stability test at 530 °C.

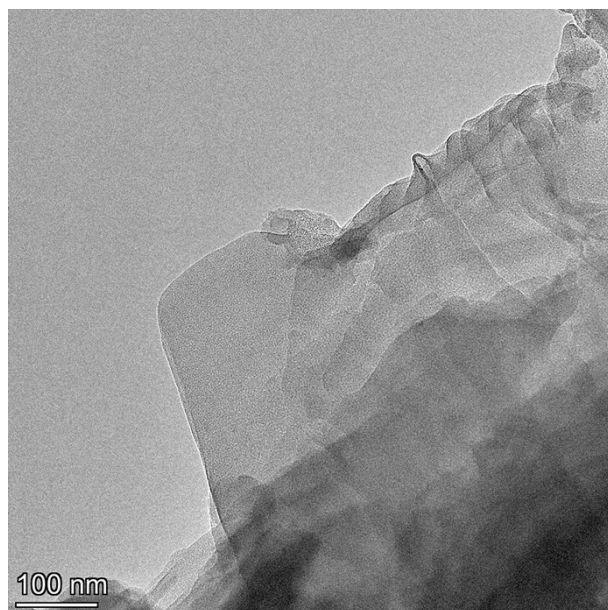

**Figure S7.** TEM image of Mg-BNSs after the catalytic test for 100 h.

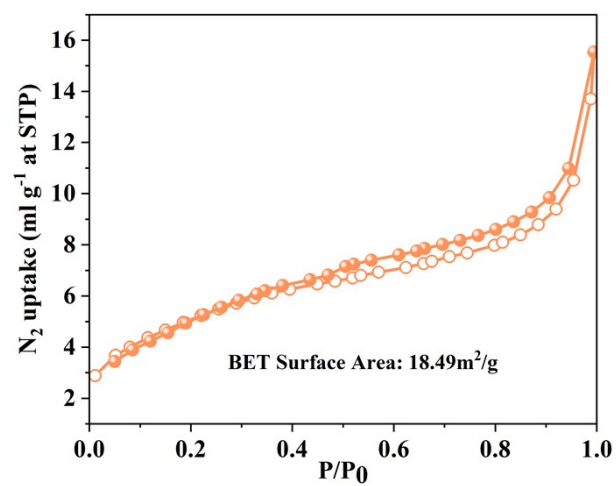

**Figure S8.** N<sub>2</sub> sorption isotherms of Mg-BNSs after the catalytic test for 100 h.

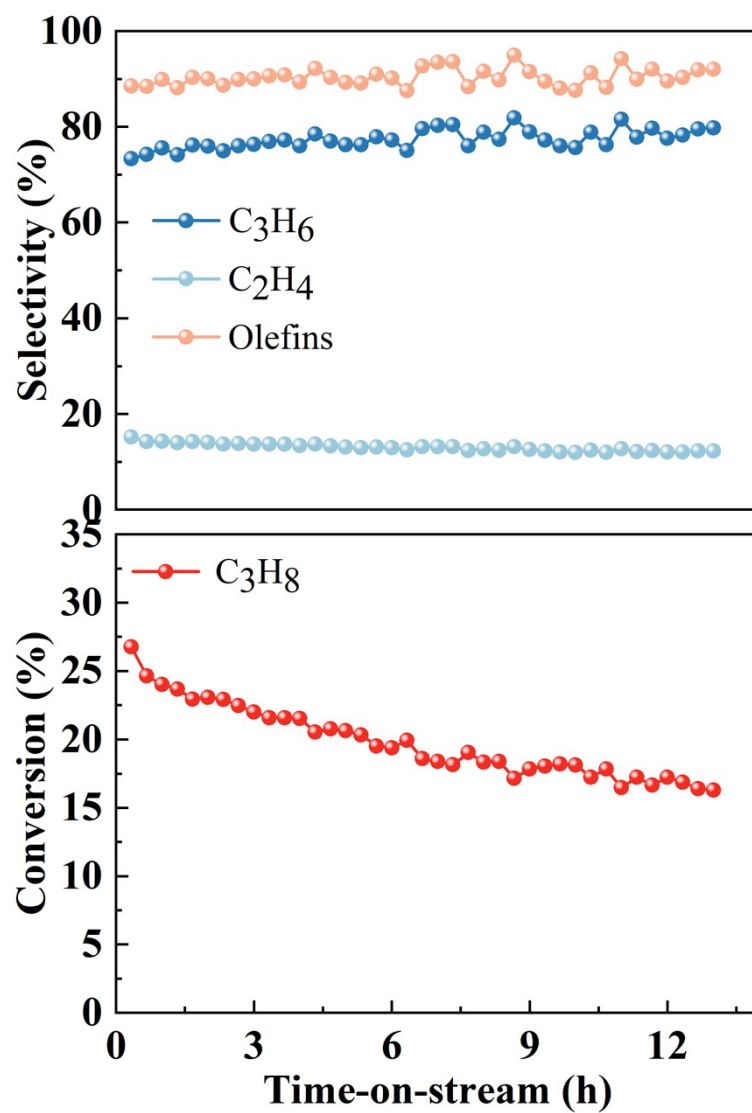

**Figure S9.** Long-term stability test of h-BN at 530 °C. Reaction conditions: atmospheric pressure,  $C_3H_8/O_2/N_2$  ratio = 1 :1 :3, WHSV = 24000 ml/g/h.

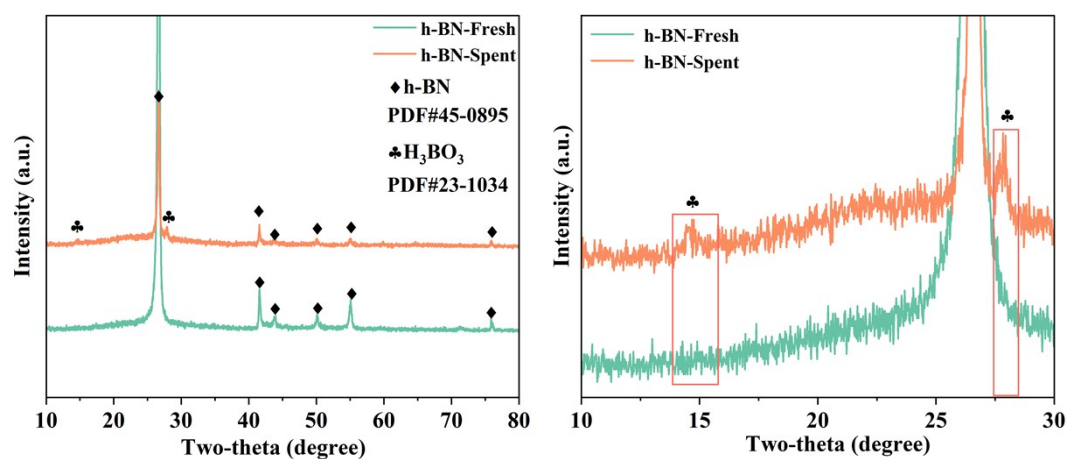

**Figure S10.** XRD patterns of the fresh h-BN and the spent h-BN.

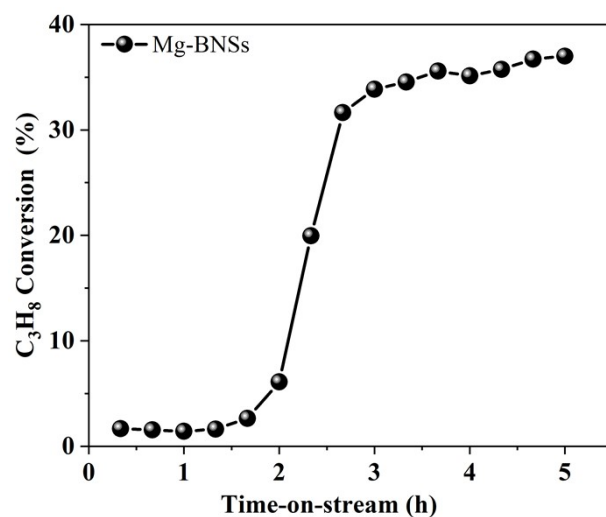

**Figure S11.** Propane conversion as a function of time on stream on the fresh Mg-BNSs at 530 °C. Reaction conditions: atmospheric pressure, C<sub>3</sub>H<sub>8</sub>/O<sub>2</sub>/N<sub>2</sub> ratio = 1 :1 :3, WHSV = 24000 ml/g/h.

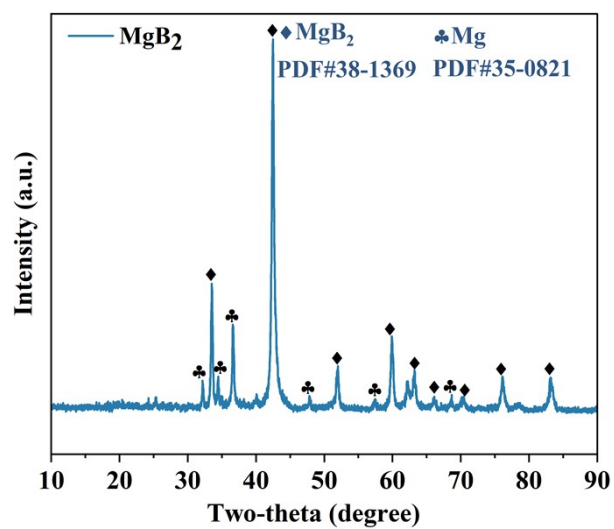

**Figure S12.** XRD pattern of commercial  $\text{MgB}_2$ .

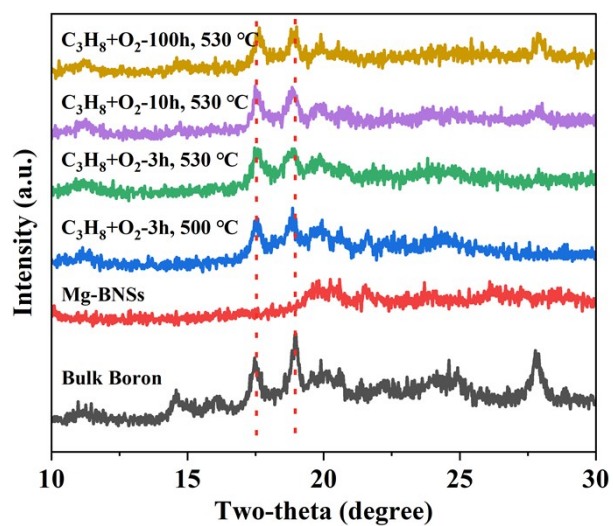

**Figure S13.** Selected regions of the XRD patterns of bulk boron, Mg-BNSs and their spent forms.

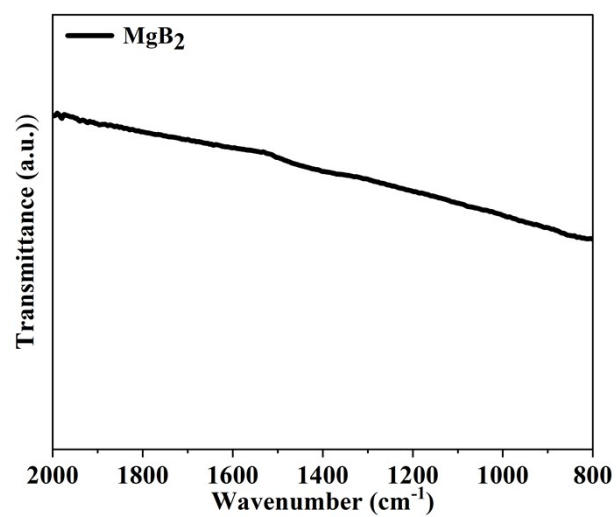

**Figure S14.** FT-IR spectrum of MgB<sub>2</sub>.

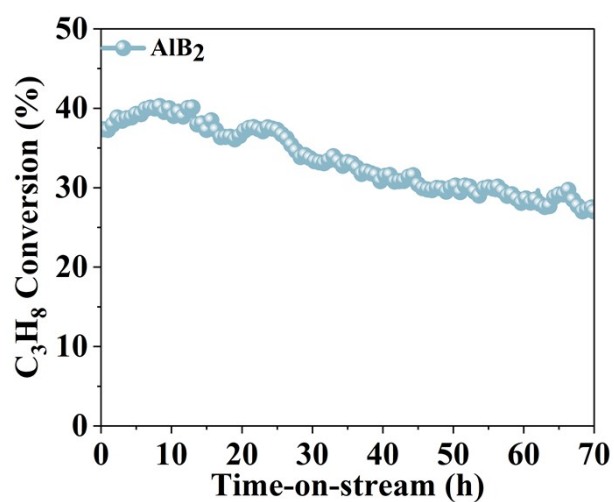

**Figure S15.** Propane conversion as a function of time on stream on the pristine AlB<sub>2</sub> at 530 °C. Reaction conditions: atmospheric pressure, C<sub>3</sub>H<sub>8</sub>/O<sub>2</sub>/N<sub>2</sub> ratio = 1 :1 :3, WHSV = 24000 ml/g/h.

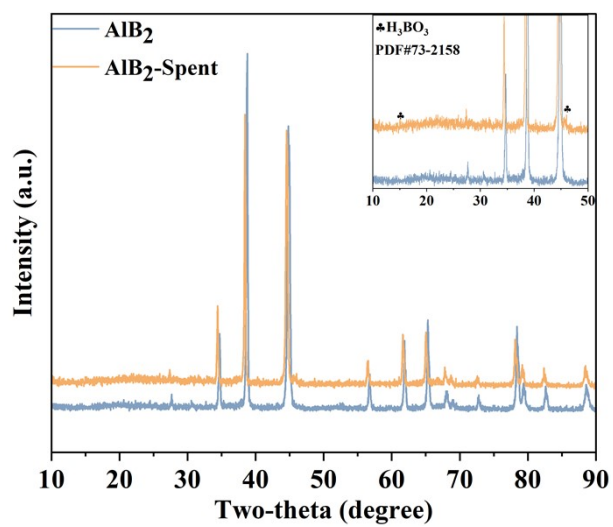

**Figure S16.** XRD pattern of  $\text{AlB}_2$  and the spent  $\text{AlB}_2$ .

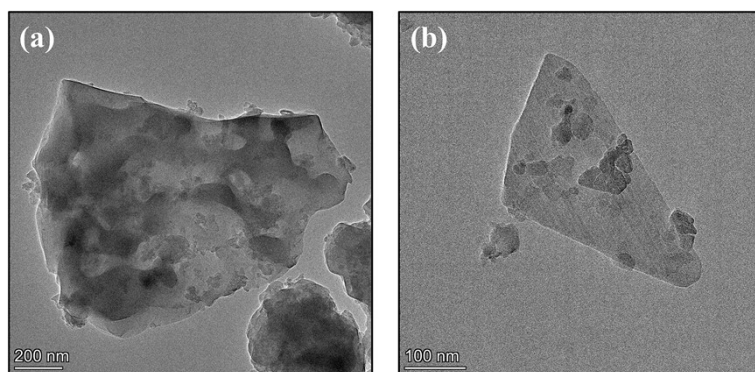

**Figure S17.** TEM images of (a) AlB<sub>2</sub> and (b) Al-BNSs.

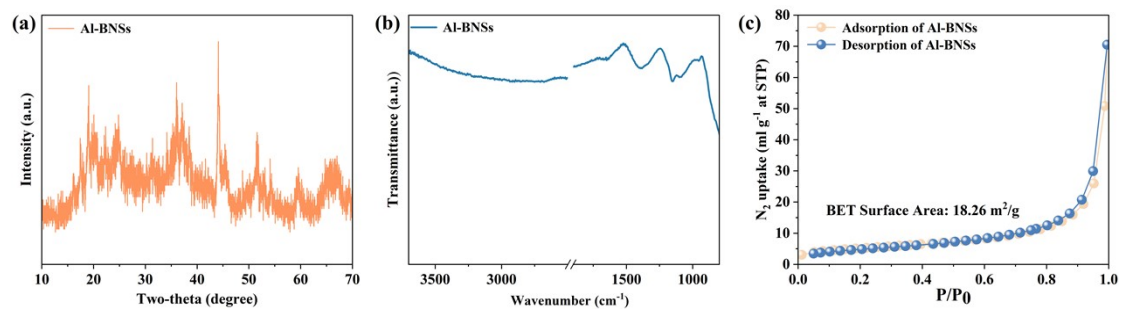

**Figure S18.** (a) XRD pattern, (b) FT-IR spectrum and (c) N<sub>2</sub> adsorption and desorption studies of Al-BNSs.

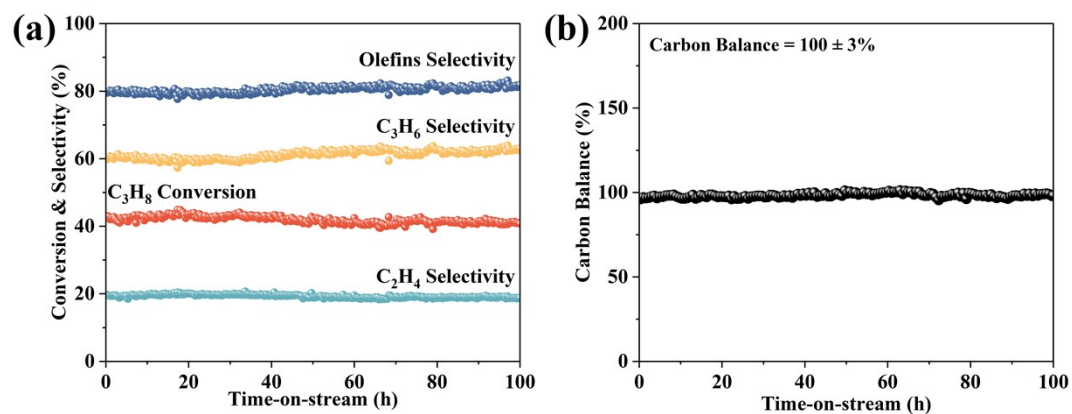

**Figure S19.** (a) Stability test of Al-BNSs at 530 °C over 100 h. (b) Carbon balance of Al-BNSs during the stability test at 530 °C. Reaction conditions: atmospheric pressure, C<sub>3</sub>H<sub>8</sub>/O<sub>2</sub>/N<sub>2</sub> ratio = 1 :1 :3, WHSV = 24000 ml/g/h.

---

**Table S1.** ICP-OES analysis results of Mg-BNSs.

| Sample                | ICP-AES value (mg/L) |      | Stoichiometric ratio              |
|-----------------------|----------------------|------|-----------------------------------|
|                       | Mg                   | B    | Mg:B                              |
| MgB <sub>2</sub> -HCl | 1.16                 | 8.57 | Mg <sub>0.12</sub> B <sub>2</sub> |

Note: the stoichiometric ratio was calculated by using the following formula:

$$\frac{\text{Elemental concentration of Mg}}{\text{Atomic weight of Mg (24.3)}} : \frac{\text{Elemental concentration of B}}{\text{Atomic weight of B (10.8)}}$$

---

**Table S2.** Elements compositions of MgB<sub>2</sub>, Mg-BNSs, and the spent Mg-BNSs based on XPS analysis results.

| <b>Samples</b>   | <b>B (at.%)</b> | <b>Mg (at.%)</b> | <b>O (at.%)</b> |
|------------------|-----------------|------------------|-----------------|
| MgB <sub>2</sub> | 17.81           | 16.73            | 65.46           |
| Mg-BNSs-Fresh    | 80.57           | 1.61             | 17.82           |
| Mg-BNSs-Spent    | 42.64           | 2.40             | 54.96           |

**Table S3.** Catalytic performance of Mg-BNSs in comparison with the reported boron-based catalysts in ODHP.

| No. | Catalysts                                                     | Temp.<br>[°C] | Conv.<br>[%] | Selectivity [%]  |                  |                    | Productivity<br>[ $\frac{\text{g}_{\text{olefin}}}{\text{g}_{\text{cat}} \cdot \text{h}}$ ] | Ref.      |
|-----|---------------------------------------------------------------|---------------|--------------|------------------|------------------|--------------------|---------------------------------------------------------------------------------------------|-----------|
|     |                                                               |               |              | C <sub>3</sub> = | C <sub>2</sub> = | C <sub>2,3</sub> = |                                                                                             |           |
| 1   | WB                                                            | 500           | 2.5          | 87.9             | 7.3              | 95.2               | 0.13                                                                                        | 1         |
| 2   | NiB                                                           | 500           | 6.1          | 85.4             | 9.3              | 94.7               | 0.40                                                                                        | 1         |
| 3   | Ti <sub>2</sub> B                                             | 500           | 5.8          | 85.4             | 9.1              | 94.5               | 0.50                                                                                        | 1         |
| 4   | B <sub>4</sub> C                                              | 500           | 7.0          | 84.2             | 9.3              | 93.5               | 0.60                                                                                        | 1         |
| 5   | h-BN                                                          | 490           | 14           | 79.0             | 12.0             | 91.0               | 0.50                                                                                        | 2         |
| 6   | High surface<br>area BN                                       | 525           | 24           | 69.0             | -                | -                  | 0.04                                                                                        | 3         |
| 7   | BS-1                                                          | 540           | 23.8         | 55.4             | 27.2             | 82.6               | 0.12                                                                                        | 4         |
| 8   | B <sub>2</sub> O <sub>3</sub> /Al <sub>2</sub> O <sub>3</sub> | 550           | 24.1         | 42.6             | 12.5             | 55.1               | 0.35                                                                                        | 5         |
| 9   | BOS-10                                                        | 450           | 14.8         | 73.3             | 14.1             | 87.4               | 1.1                                                                                         | 6         |
| 10  | B <sub>2</sub> O <sub>3</sub> @BPO <sub>4</sub>               | 550           | 24.7         | 66.4             | 18.4             | 84.8               | 0.79                                                                                        | 7         |
| 11  | SiB <sub>6</sub>                                              | 535           | 19.2         | 82.2             | 12.2             | 94.4               | 1.49                                                                                        | 8         |
| 12  | B-MWW                                                         | 540           | 29.9         | 72.5             | 15.3             | 87.8               | 1.11                                                                                        | 9         |
| 13  | Mg-BNSs                                                       | 530           | 39.8         | 63.5             | 18.4             | 81.9               | 2.48                                                                                        | This work |
| 14  | Mg-BNSs                                                       | 540           | 53.8         | 48.8             | 25.6             | 74.4               | 2.91                                                                                        | This work |

---

**Table S4.** The prices of MgB<sub>2</sub> and AlB<sub>2</sub> from different resources.

| Samples          | Yield of boron nanosheet (wt%) | Cost (CNY/g) |
|------------------|--------------------------------|--------------|
| MgB <sub>2</sub> | 27.0                           | 1.2          |
| AlB <sub>2</sub> | 24.3                           | 9.5          |

Note: The price was calculated based on the price of MgB<sub>2</sub> from RHAWN (30.73 CNY/25g) as of when this work was submitted. And the price of AlB<sub>2</sub> from Acmec (47.55 CNY/5g) as of when this work was submitted.

---

## References:

1. J. T. Grant, W. P. McDermott, J. M. Venegas, S. P. Burt, J. Micka, S. P. Phivilay, C. A. Carrero and I. Hermans, *ChemCatChem*, 2017, **9**, 3623-3626.
2. J. T. Grant, C. A. Carrero, F. Goeltl, J. Venegas, P. Mueller, S. P. Burt, S. E. Specht, W. P. McDermott, A. Chieregato and I. Hermans, *Science*, 2016, **354**, 1570-1573.
3. P. Chaturbedy, M. Ahamed and M. Eswaramoorthy, *ACS Omega*, 2018, **3**, 369-374.
4. H. Zhou, X. F. Yi, Y. Hui, L. Wang, W. Chen, Y. C. Qin, M. Wang, J. B. Ma, X. F. Chu, Y. Q. Wang, X. Hong, Z. F. Chen, X. J. Meng, H. Wang, Q. Y. Zhu, L. J. Song, A. M. Zheng and F. S. Xiao, *Science*, 2021, **372**, 76-80.
5. O. V. Buyevskaya, M. Kubik and M. Baerns, in *Heterogeneous Hydrocarbon Oxidation*, ed. B. K. Warren and S. T. Oyama, 1996, ch. 11, pp. 155–169.
6. W.-D. Lu, D. Wang, Z. Zhao, W. Song, W.-C. Li and A.-H. Lu, *ACS Catal.*, 2019, **9**, 8263-8270.
7. Q. Liu, Y. Wu, F. Xing, Q. Liu, X. Guo and C. Huang, *J. Catal.*, 2020, **381**, 599-607.
8. B. Yan, W.-C. Li and A.-H. Lu, *J. Catal.*, 2019, **369**, 296-301.
9. B. Qiu, F. Jiang, W.-D. Lu, B. Yan, W.-C. Li, Z.-C. Zhao and A.-H. Lu, *J. Catal.*, 2020, **385**, 176-182.
